# Supplementary material for: A novel microRNAs expression signature for hepatocellular carcinoma diagnosis and prognosis
Source: PubMed Central journal article supplement (PMC5352440; doi:10.18632/oncotarget.14452), 2017-01-02
Supplement: oncotarget-08-8775-s001.pdf [file oncotarget-08-8775-s001.pdf]

# A novel microRNAs expression signature for hepatocellular carcinoma diagnosis and prognosis

## SUPPLEMENTARY FIGURES AND TABLES

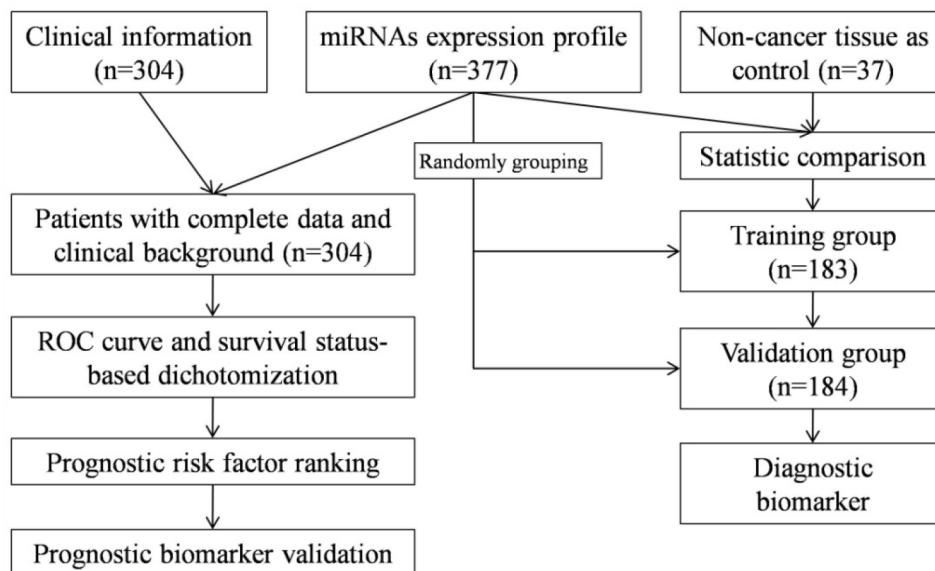

Supplementary Figure 1: Flowchart of the study.

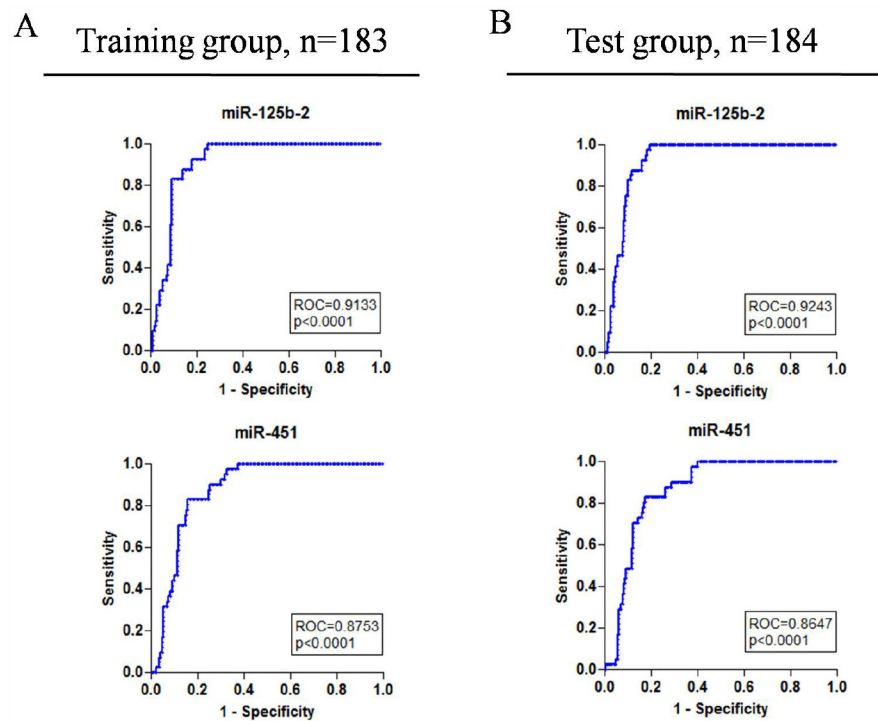

**Supplementary Figure 2: Validation of miRNAs for HCC prediction.** The sensitivity and specificity of miR-125b-2 and miR-451 was 0.9133 and 0.8753 respectively (A., n=183, p<0.0001). The test group showed ROC value was 0.9243 and 0.8647 respectively (B., n=184, p<0.0001).

**Supplementary Table 1: GO Term of Biological Process**

See Supplementary File 1

Supplementary Table 2: GO Term of Cellular Component

| GO Term                                     | Count | Genes                                                                                                                                                                                                                                                                                                                                                                                                                         | p-value |
|---------------------------------------------|-------|-------------------------------------------------------------------------------------------------------------------------------------------------------------------------------------------------------------------------------------------------------------------------------------------------------------------------------------------------------------------------------------------------------------------------------|---------|
| GO:0005875 microtubule associated complex   | 7     | KIF1B, ATG4B, KIF5C, KLC4, MAP7, DCTN6, DCX                                                                                                                                                                                                                                                                                                                                                                                   | 0.0155  |
| GO:0044459 plasma membrane part             | 58    | ABCF1, SLC22A12, SLC20A2, TGFB3, SYT9, ZFYVE20, CLTC, MMP24, KCNJ13, ACTR3, SLC1A2, SLC1A3, SPRED2, TOMM34, RHOH, RAP2B, ARL1, ARC, PDPN, MDGA1, PRKCI, STIM1, IGSF6, IGSF5, ACVR2A, CD80, GRM8, EPB41L5, CLDN2, LAMC2, HAS3, EDA, RAB10, EIF5A2, SNX18, FKBP8, AP1M2, PANX1, DRD2, FCER2, ABI2, CDH2, EPHB4, RIMS4, SYPL1, CD69, PRIMA1, TES, GABRA4, SLC12A2, NCKAP1, GJB2, SLC17A8, CDC42BPA, TGFB3, MAP7, MERTK, SLC25A17 | 0.0161  |
| GO:0031252 cell leading edge                | 8     | ACTR3, SLC1A2, CTTN, PDPN, CDC42BPA, ABI2, CDH2, FBXO10                                                                                                                                                                                                                                                                                                                                                                       | 0.0195  |
| GO:0012505 endomembrane system              | 25    | FKBP8, SLC9A6, AP1M2, LEMD3, DSCR3, CLTC, SSR1, ACTR3, AAK1, NUP50, CYP26B1, FNDC3A, SPTLC2, STIM1, GJB2, MAN2A2, APOL2, SLC17A8, KIF1B, CHST6, EDA, CYP8B1, STEAP2, EIF5A2, LRPPRC                                                                                                                                                                                                                                           | 0.0207  |
| GO:0009898 internal side of plasma membrane | 13    | RAP2B, ARL1, SNX18, FKBP8, AP1M2, SPRED2, CLTC, ZFYVE20, RAB10, EIF5A2, NCKAP1, RHOH, TOMM34                                                                                                                                                                                                                                                                                                                                  | 0.0230  |
| GO:0031090 organelle membrane               | 32    | FKBP8, COX11, AP1M2, SLC9A6, LEMD3, CLTC, SSR1, ACTR3, SLC1A3, CYP26B1, PXMP4, FNDC3A, TOMM34, DNMI1, SPTLC2, STIM1, VTI1B, GJB2, MAN2A2, APOL2, PPIF, SLC17A8, KIF1B, CHST6, SLC25A10, CYP8B1, STEAP2, CTNS, EDA, SLC25A15, LRPPRC, SLC25A17                                                                                                                                                                                 | 0.0260  |
| GO:0044431 Golgi apparatus part             | 12    | ACTR3, MAN2A2, STX6, ARL1, DNMI1, AP1M2, CHST6, CLTC, STEAP2, GOLGA4, GGA3, GJB2                                                                                                                                                                                                                                                                                                                                              | 0.0315  |
| GO:0000151 ubiquitin ligase complex         | 6     | RNF8, CUL3, RNF144B, WWP1, UBE4B, FBXO10                                                                                                                                                                                                                                                                                                                                                                                      | 0.0325  |
| GO:0042995 cell projection                  | 22    | ARC, PANX1, SLC22A12, PDPN, DRD2, KIF5C, LDB3, ABI2, CDH2, NCKAP1, ACTR3, ACTR2, SLC1A2, CTTN, SLC1A3, GRM8, LRRTM1, CNTN4, SEMA3A, MERTK, HCN4, FBXO10                                                                                                                                                                                                                                                                       | 0.0350  |
| GO:0031012 extracellular matrix             | 13    | MATN2, ADAMTS18, ADAMTS19, TGFB3, OLFML2A, MMP24, ADAMTS6, COL19A1, SLC1A3, COL12A1, LAMC2, NCAN, ADAMTS5                                                                                                                                                                                                                                                                                                                     | 0.0402  |
| GO:0030027 lamellipodium                    | 5     | ACTR3, CTTN, PDPN, ABI2, CDH2                                                                                                                                                                                                                                                                                                                                                                                                 | 0.0492  |
